# Errata

Cheung N, Wang JJ, Klein R, Couper DJ, Sharrett AR, Wong TY: Diabetic retinopathy and the risk of coronary heart disease: the Atherosclerosis Risk in Communities Study. *Diabetes Care* 30:1742–1746, 2007

In the legend for Fig. 1 of the above-listed article, solid and dashed lines were incorrectly explained. The correct figure and legend appear below.

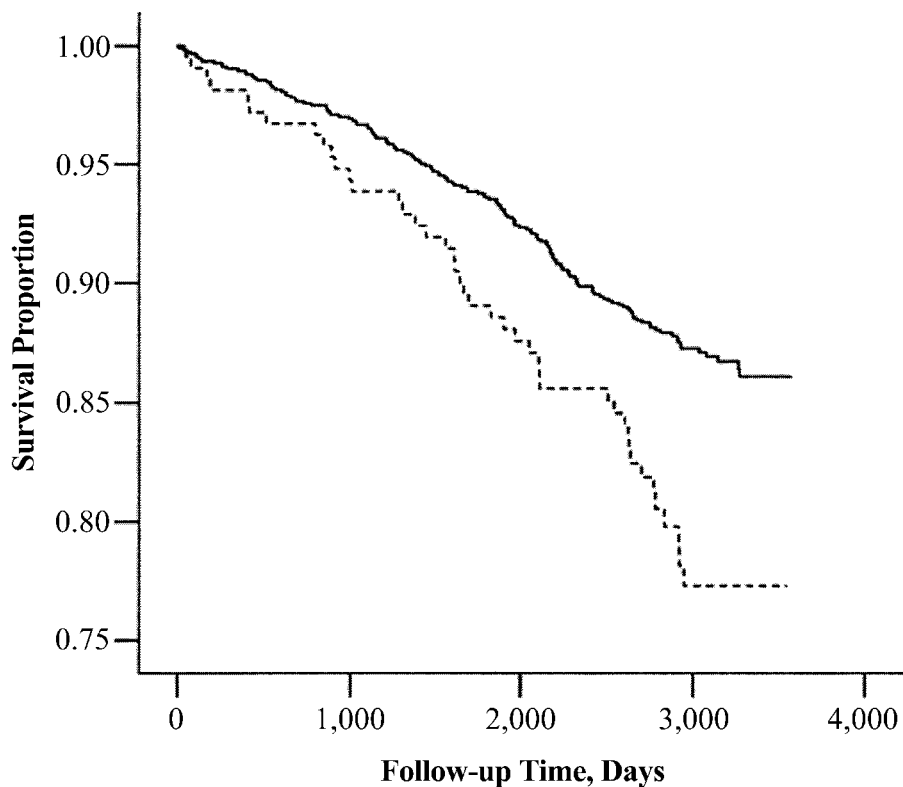

**Figure 1**—CHD-free survival in participants with (dashed line) and without (solid line) diabetic retinopathy.
